# Supplementary material for: Development of amide-based molecular cages for the highly selective and sensitive detection of nicotine
Source: Royal Society of Chemistry journal article supplement (doi:10.1039/d5ay00206k), 2025-01-01
Supplement: d5ay00206k1.pdf [file d5ay00206k1.pdf]

## Supporting information

# Development of Amide-Based Molecular Cages for the Highly Selective and Sensitive Detection of Nicotine

Mina Bagherifard,<sup>1</sup> Amrit Kaur,<sup>1</sup> Kamal E. S. Nassar,<sup>1</sup> Neelam Tariq,<sup>1</sup> Zois Syrgiannis,<sup>1</sup> and Ioannis Spanopoulos\*<sup>1</sup>

<sup>1</sup>Department of Chemistry, University of South Florida, Tampa, Florida 33620, United States

Corresponding author:  
spanopoulos@usf.edu

### Table of contents

- Section S1. Materials and methods
- Section S2. Overview of reported nicotine sensors
- Section S3. Synthesis section
- Section S4. Characterization
  - a. NMR measurements
  - b. MALDI-TOF mass spectrometry
  - c. FT-IR spectroscopy
  - d. Thermogravimetric analysis
- Section S5. Properties
  - a. Solvatochromism
  - b. Absorption/emission spectra of various water fractions
  - c. UV-Vis spectra of nicotine titration
  - d. Selectivity studies
  - e. Stern-Volmer diagram
  - f. Time-resolved photoluminescence studies
  - g. <sup>1</sup>H NMR nicotine titration
  - h. DLS measurements
  - i. Emission spectra at different excitation wavelength
  - j. Absorption and emission spectra of Nicotine and BiP-Am
  - k. BiP-Am emission in different matrices before/after nicotine addition
  - l. DFT and TD-DFT data
- Section S6. References

# 1. Materials and methods

## Reagents

All reagents and chemicals for synthesis were used without further purification. [1,1'-Biphenyl]-4,4'-dicarbaldehyde (97.08%) was purchased from AmBeed. Tris(2-aminoethyl)amine (98%) was purchased from TCI. Ammonium chloride, urea, sodium chloride, potassium chloride, magnesium sulfate, tetrabutylammonium chloride, tetrabutylammonium fluoride, acetone, acetonitrile, methanol, and dimethyl sulfoxide (DMSO) were provided by Fisher Chemical. Sodium chlorite was acquired from Acros Organics. (S)-(-)-Nicotine (99%) was purchased from Alfa Aesar. (1S)-(-)- $\alpha$ -pinene (98%), alpha-Cyano-4-hydroxycinnamic acid, THF, ethyl alcohol (99.5%), and uric acid were acquired from Thermo Scientific. Bovine Albumin serum (BSA) and cholesterol were provided from Gibco and MP Biomedicals, respectively. Calcium chloride, pyridine, pyrrolidine, L-Alanine, L-Arginine, L-Leucine, and glucose were purchased from Sigma Aldrich.

## NMR measurements

All NMR measurements were performed using a Bruker Neo 600 MHz NMR spectrometer.

## MALDI-TOF mass spectrometry

The mass spectroscopy data was acquired on Bruker UltraFleXtreme MALDI-TOF/TOF. Ultra-pure alpha-Cyano-4-hydroxycinnamic acid matrix was used for sample investigations.

## TGA measurements

Thermogravimetric Analysis (TGA) measurements were performed on a TA Instruments Q50 Thermogravimetric Analyzer. About 9 mg sample was placed on an Alumina pan and heated up to 700 °C while the heating ramp was kept 5 °C/minute under an inert atmosphere.

## FT-IR Spectroscopy

Fourier-transform infrared (FT-IR) spectroscopy measurements were performed using a PerkinElmer Spectrum Two FT-IR spectrometer, covering a spectral range of 3500-400  $\text{cm}^{-1}$ .

## UV-Vis Spectroscopy

UV-Vis spectra were recorded on Shimadzu UV-1900i.

## PL/TRPL Measurements

PL and TRPL studies were performed using an Edinburgh Instruments FS5 spectrofluorometer equipped with a 150 W xenon lamp and a 300 nm EPLED picosecond pulsed LED.

## Quantum Yield Calculation

FS5 Spectrofluorometer equipped with an integrating sphere for photoluminescence quantum yield (PLQY) determination was utilized to measure quantum yield.

### **Scanning Electron Microscopy (SEM)**

Scanning electron microscopy (SEM) measurements were performed using a high-resolution thermal field emission Hitachi SU-70 microscope at an accelerating voltage of 20 kV. Two different samples were prepared: one without nicotine and one with nicotine. For the sample without nicotine, 200  $\mu\text{L}$  of a 1 mM **BiP-Am** solution was mixed with 800  $\mu\text{L}$  of deionized water. For the sample with nicotine, 50  $\mu\text{L}$  of a nicotine stock solution (0.1 M) was added to the same **BiP-Am** and deionized water mixture.

### **UV-Vis and Fluorescence sample preparation**

For the UV-Vis and fluorescence titrations, a 1 mM stock solution of **BiP-Am** was prepared in DMSO. The nicotine stock solution (0.1 M) was prepared by dissolving 16  $\mu\text{L}$  of S-nicotine in 984 mL of distilled water and was further serially diluted to obtain the desired concentrations. A 10  $\mu\text{M}$  concentration of **BiP-Am** (30  $\mu\text{L}$  of 1 mM **BiP-Am** stock solution in total 3 mL aqueous sample) was used for each titration. For testing interfering analytes ( $\text{Na}^+$ ,  $\text{K}^+$ ,  $\text{Ca}^{2+}$ ,  $\text{Mg}^{2+}$ ,  $\text{NH}_4^+$ ,  $\text{Cl}^-$ ,  $\text{F}^-$ , alanine, arginine, leucine, bovine serum albumin (BSA), glucose, cholesterol, urea, uric acid, and nicotine), standard solutions were prepared with a 0.1 M stock solution of each interferes and diluted to appropriate concentrations ranging from 0 to 1.0 mM for spectral recording. In the titration experiments, 3 mL of a **BiP-Am** solution (30  $\mu\text{L}$  of probe in 2970  $\mu\text{L}$  of distilled water) was placed in a quartz cuvette (path length 1 cm), and spectra were recorded after the addition of the appropriate analyte.

### **Real-world sample preparation**

To determine the amount of nicotine in commercially available cigarettes, 250 mg of tobacco leaves were measured and ground to a powder. Subsequently, 5 mL of deionized (DI) water was added to extract the nicotine. The mixture was sonicated for 3 hours, then centrifuged and filtered to obtain a clear nicotine solution. The solution was diluted 100-fold with DI water. Urine samples were also diluted 100-fold and sonicated for 1 hour. The prepared solutions were then filtered and used for further analysis. Standard nicotine solutions were spiked into the cigarette and urine samples and quantified using a calibration curve.

The human urine samples were de-identified urine samples from persons 18-50 years of age. Corresponding IRB protocol # STUDY007287 was evaluated by the University IRB committee, concluding that: "The IRB determined that the proposed activity does not constitute research involving human subjects as defined by DHHS and FDA regulations." Therefore, no written consent was required.

## 2. Overview of reported nicotine sensors

**Table S1.** Comparison table of previously reported Nicotine sensors in terms of detection methods and limit of detection (LOD).

| No. | Reference                                                              | Material Type                                           | Response Techniques                    | LOD       |
|-----|------------------------------------------------------------------------|---------------------------------------------------------|----------------------------------------|-----------|
| 1.  | Current work                                                           | Amide-base cages (BiP-Am)                               | “turn-off” Fluorescent sensors         | 0.4 nM    |
| 2.  | <i>ACS Appl. Bio Mater.</i> <b>2024</b> , 7, 4, 2346–2353 <sup>1</sup> | Zinc based metalloporphyrin                             | “turn-on” Fluorescent sensors          | 7.2 nM    |
| 3.  | <i>Anal. Methods</i> , <b>2023</b> , 15, 6377-6384 <sup>2</sup>        | Gold Nanoparticle AuNPs                                 | Colorimetric sensor                    | 2480 nM   |
| 4.  | <i>Inorg. Chem.</i> <b>2023</b> , 62, 20458–20466 <sup>3</sup>         | Eu(bpy)@HOF                                             | “turn-off” Fluorescent sensors         | 591 nM    |
| 5.  | <i>J. Mater. Chem. A</i> , <b>2023</b> , 11, 4739-4750 <sup>4</sup>    | Tb@HOF                                                  | “turn-on” Fluorescent sensors          | 42 nM     |
| 6.  | <i>ACS Appl. Nano Mater.</i> <b>2022</b> , 5, 16753–16759 <sup>5</sup> | Co-based MO                                             | Electrochemical and Fluorescent sensor | 250 nM    |
| 7.  | <i>Anal. Methods</i> , <b>2022</b> , 14, 1579-1584 <sup>6</sup>        | gold screen-printed electrode                           | electrochemical sensor                 | 39450 nM  |
| 8.  | <i>Mater. Adv.</i> , <b>2021</b> , 2, 3336-3345 <sup>7</sup>           | graphene/poly(3,4-ethylenedioxythiophene) nanocomposite | electrochemical sensor                 | 47 nM     |
| 9.  | <i>Anal. Chem.</i> <b>2020</b> , 92, 11438–11443 <sup>8</sup>          | gold nanoclusters (AuNCs)                               | Electrochemiluminescence               | 0.0007 nM |
| 10. | <i>Anal. Methods</i> , <b>2020</b> , 12, 193-199 <sup>9</sup>          | Alizarin Red S (ARS) dye                                | Colorimetric                           | 1080 nM   |
| 11. | <i>Chem. Commun.</i> , <b>2019</b> , 55, 12679-12682 <sup>10</sup>     | o-carborane derivatives                                 | “turn-off” Fluorescent sensors         | 18.5 nM   |

### 3. Synthesis

#### BiP-Am cage synthesis:

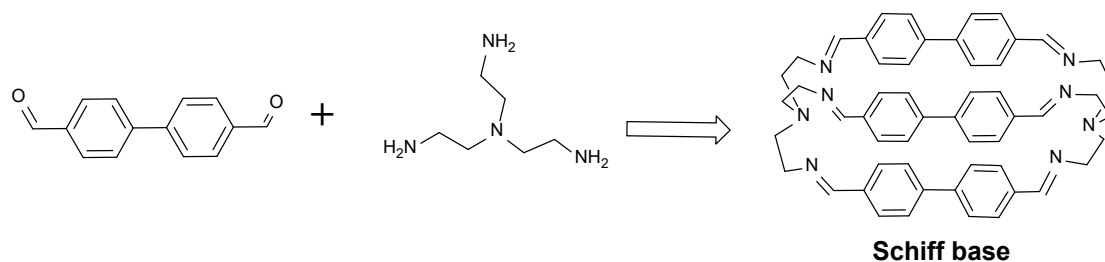

**Scheme S1.** The first step of synthesizing the BiP-Am cage is Schiff base formation.

To synthesize the **BiP-Am** cage, Schiff base formation<sup>11</sup> and Pinnick oxidation techniques were employed. In the first step, 1 g of [1,1'-Biphenyl]-4,4'-dicarbaldehyde was dissolved in 150 mL of dry acetonitrile under inert conditions. The temperature was maintained at 0 °C, and a solution of 470  $\mu$ L Tris(2-aminoethyl)amine in 125 mL of dry acetonitrile was added dropwise over two hours under vigorous stirring and inert conditions. The reaction temperature was kept below 10 °C for 8 hours, followed by room temperature for 7 days. The products were then separated from the solution by vacuum filtration (1102 mg, 85%).

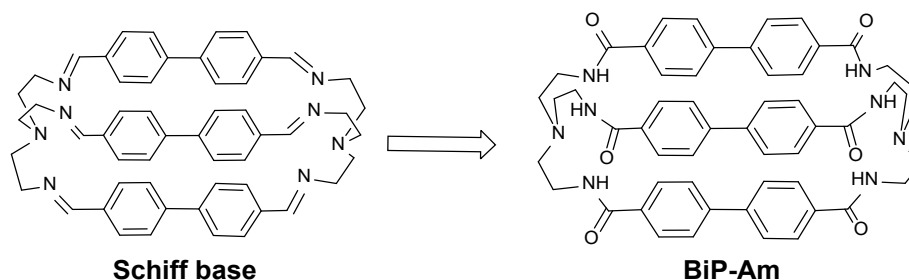

**Scheme S2.** The second step of synthesizing BiP-Am cage; Pinnick oxidation.

In the second step, 0.6 mmol of the synthesized Schiff base was suspended in 100 mL of dry THF under inert conditions. To this suspension, 20.1 mmol of sodium chlorite, 7.4 mmol of ammonium chloride, and 36.8 mmol of (1S)-(-)- $\alpha$ -pinene were added. The solution was then kept under reflux for 48 hours to obtain the white **BiP-Am** product. The synthesized **BiP-Am** was filtered and washed sequentially with methanol, water, and acetone, and then stored in a desiccator for drying (463 mg, 73%).

$^1\text{H}$  NMR (600 MHz, DMSO- $d_6$ ):  $\delta_{\text{H}}$  ppm = 2.65 - 2.76 (m, 12 H) 3.48 - 3.57 (m, 12 H) 7.16 (d,  $J=8.17$  Hz, 12 H) 7.44 (d,  $J=8.17$  Hz, 12 H) 7.73 (br t,  $J=4.81$  Hz, 6 H)

$^{13}\text{C}$  NMR (151 MHz, DMSO- $d_6$ ):  $\delta_{\text{C}}$  ppm = 35.86, 50.56, 126.05, 127.22, 133.00, 140.66, 165.91.

$[\text{M}+\text{H}]^+$  ion =  $m/z$  = 911.421

## 4. Characterization

### NMR measurements

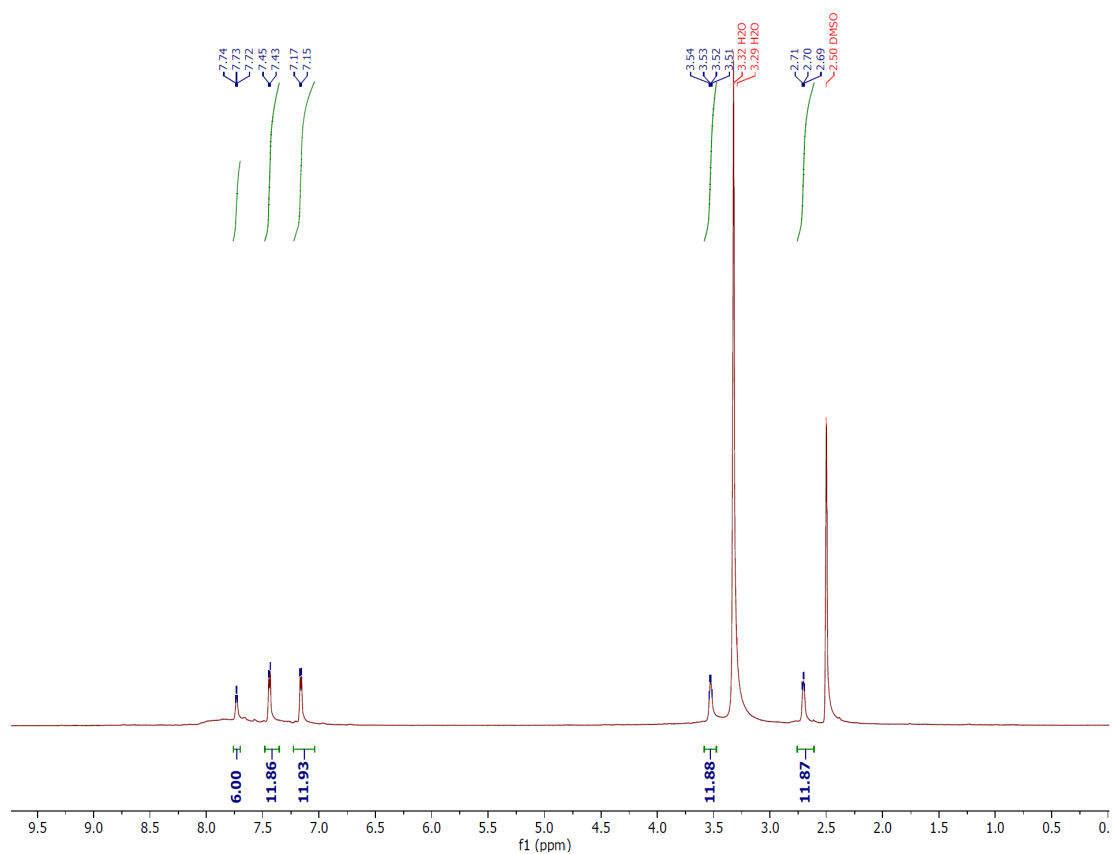

Figure S1.  $^1\text{H}$  NMR spectrum of the BiP-Am cage.

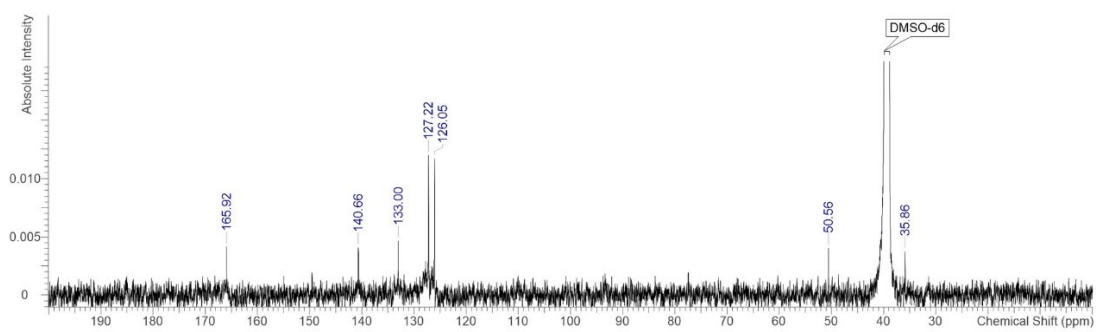

Figure S2.  $^{13}\text{C}$  NMR spectrum of the BiP-Am cage.

# MALDI-TOF mass spectrometry

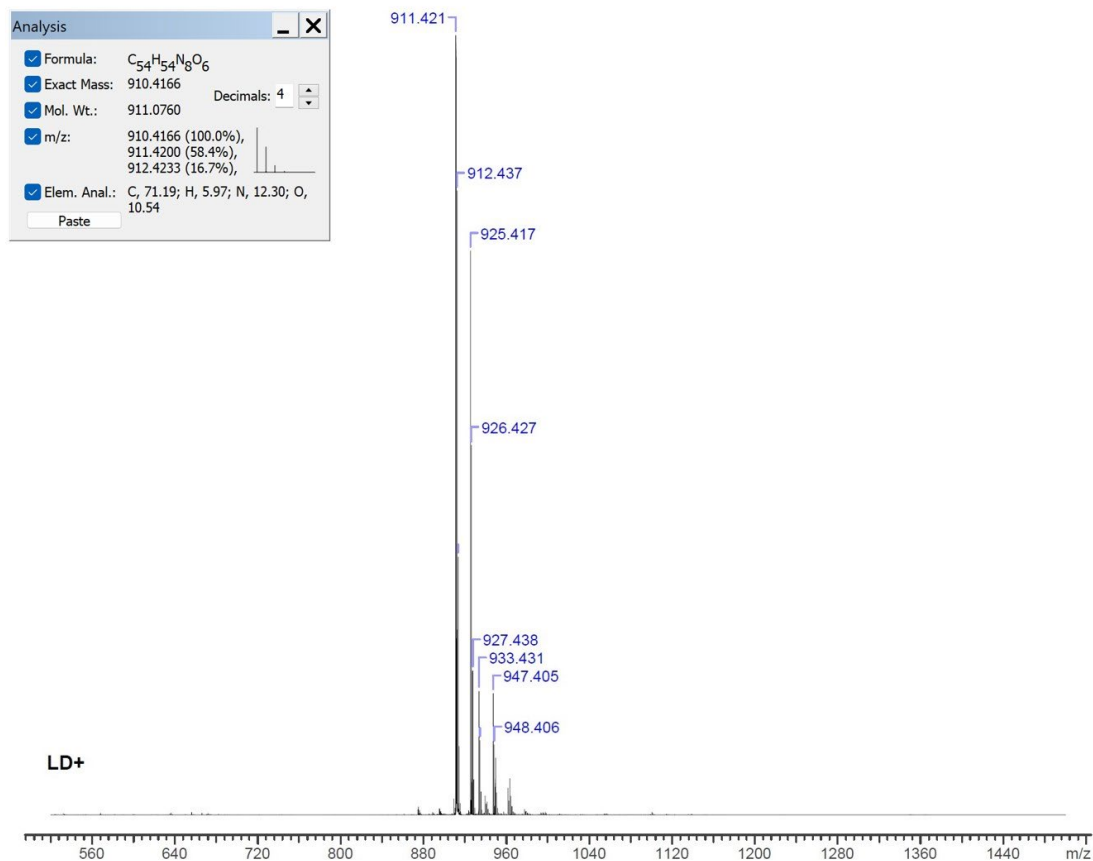

**Figure S3.** MALDI-TOF mass spectrometry data for the **BiP-Am** cage showed a  $[M+H]^+$  ion at  $m/z = 911.421$ .

## FT-IR spectroscopy

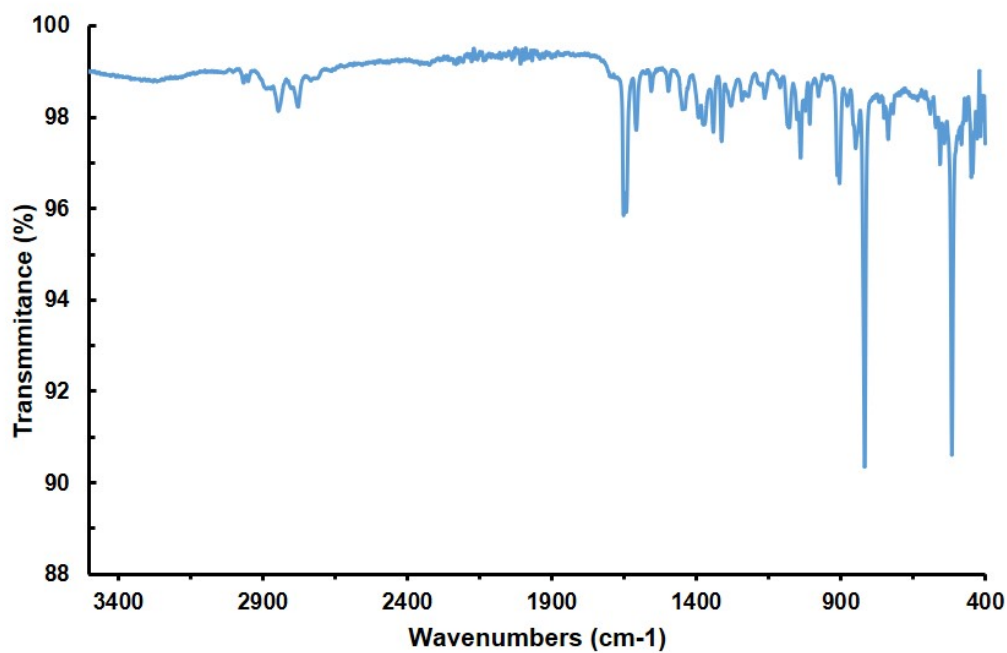

**Figure S4.** The FT-IR spectrum of intermediate **Schiff base**;  $\nu_{\max}/\text{cm}^{-1}$  1652 corresponds to the C=N double bonds.

## Thermogravimetric analysis

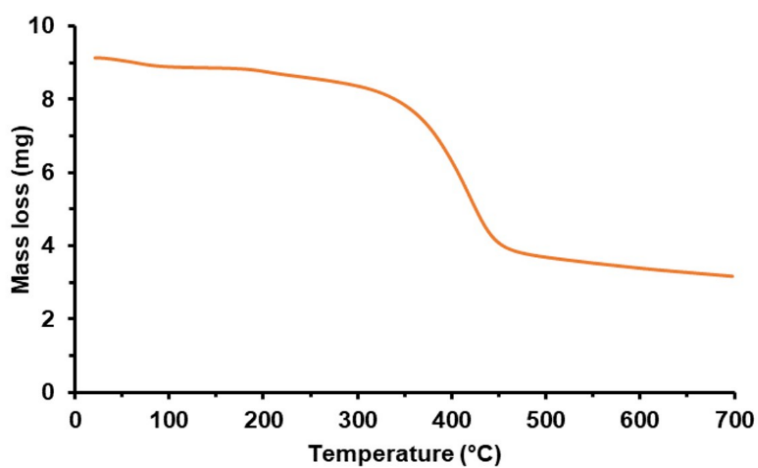

**Figure S5.** TGA curve for the **BiP-Am** cage.



## 5. Properties

### Solvatochromism

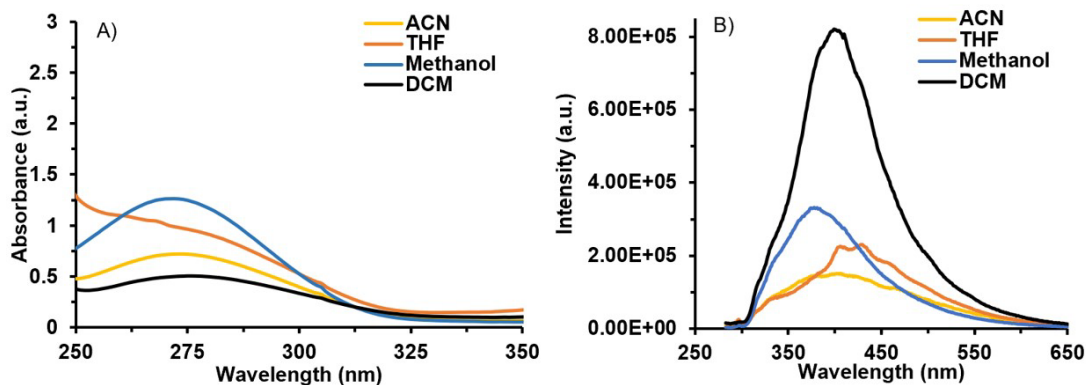

**Figure S6.** A) absorption, and B) emission spectra of the **BiP-Am** probe under excitation at 273 nm in various solvents (solvent:DMSO (9.9:0.1, v:v, 10  $\mu$ M))

### Absorption/emission spectra of various water fractions

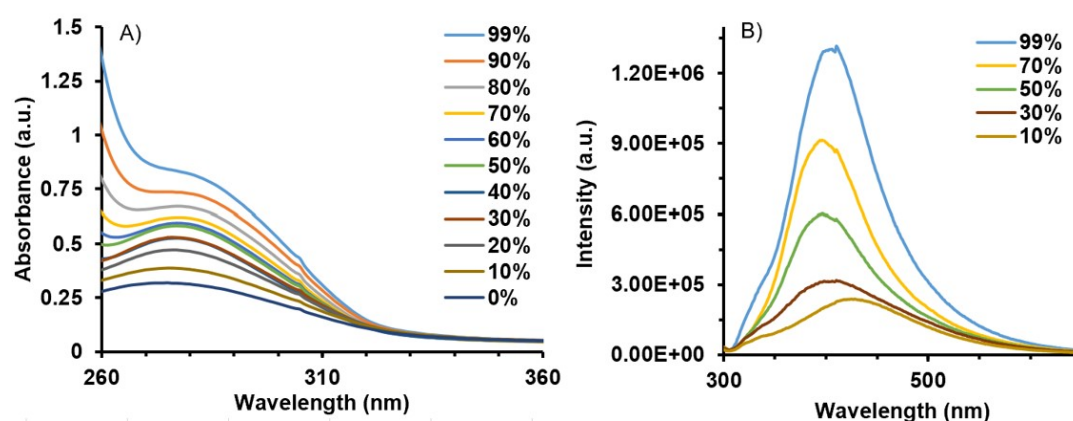

**Figure S7.** A) absorption, and B) emission spectra of the **BiP-Am** probe under excitation at 273 nm upon varying water fraction in the DMSO from 0-99% by volume; H<sub>2</sub>O:DMSO (9.9:0.1, v:v, 10  $\mu$ M) shows the most enhanced peak in both absorption and emission spectra.

## UV-Vis spectra of nicotine titration

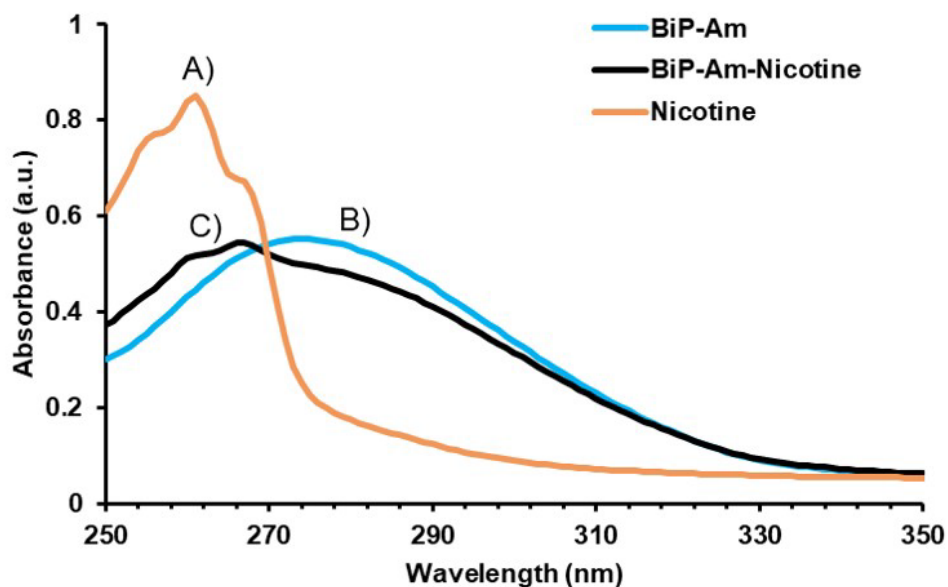

**Figure S8.** A) The UV-Vis spectrum of nicotine (0.1 M), B) **BiP-Am** probe in H<sub>2</sub>O:DMSO (9.9:0.1, v:v, 10  $\mu$ M), and C) the change in absorbance after the addition of nicotine (10  $\mu$ L of 1 mM solution) to the **BiP-Am** probe in H<sub>2</sub>O:DMSO (9.9:0.1, v:v, 10  $\mu$ M).

## Selectivity studies

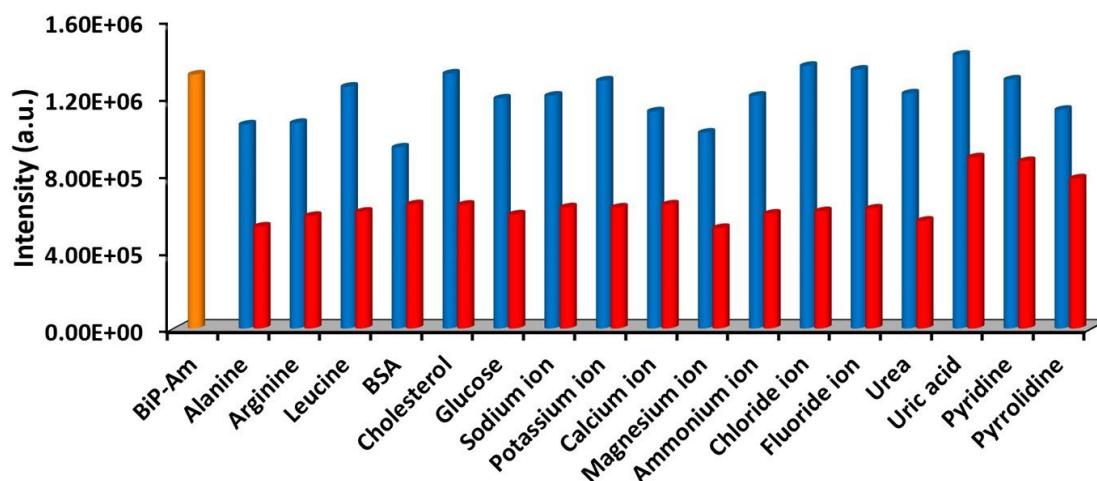

**Figure S9.** Selectivity assessment of the **BiP-Am** probe in H<sub>2</sub>O:DMSO (9.9:0.1, v/v, 10  $\mu$ M). The orange column represents the emission intensity of pure **BiP-Am**, while the blue columns depict the changes in emission upon the addition of various interfering analytes. The red columns represent the emission intensity in the presence of both the interferent and nicotine. All emission spectra were recorded under excitation at 273 nm.

## Stern-Volmer diagram

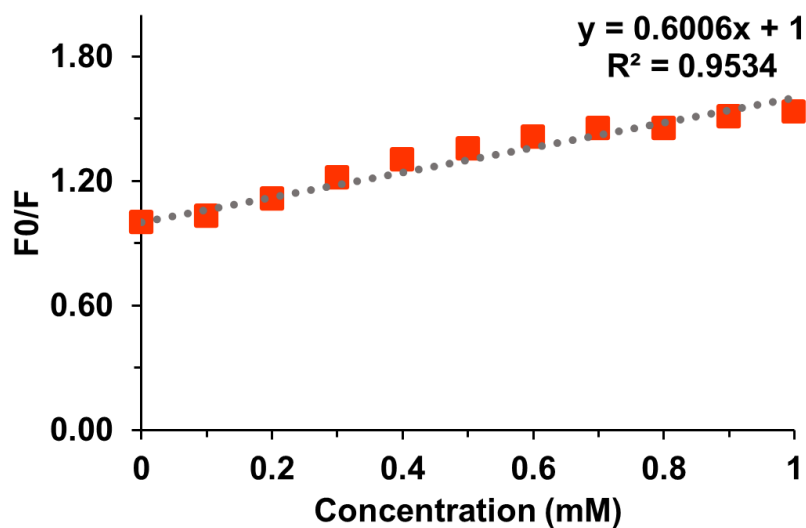

**Figure S10.** Stern-Volmer diagram of **BiP-Am** in H<sub>2</sub>O:DMSO (9.9:0.1, v:v, 10 μM) upon addition of 0.1 M Nicotine to the solution.

## Time-resolved photoluminescence studies

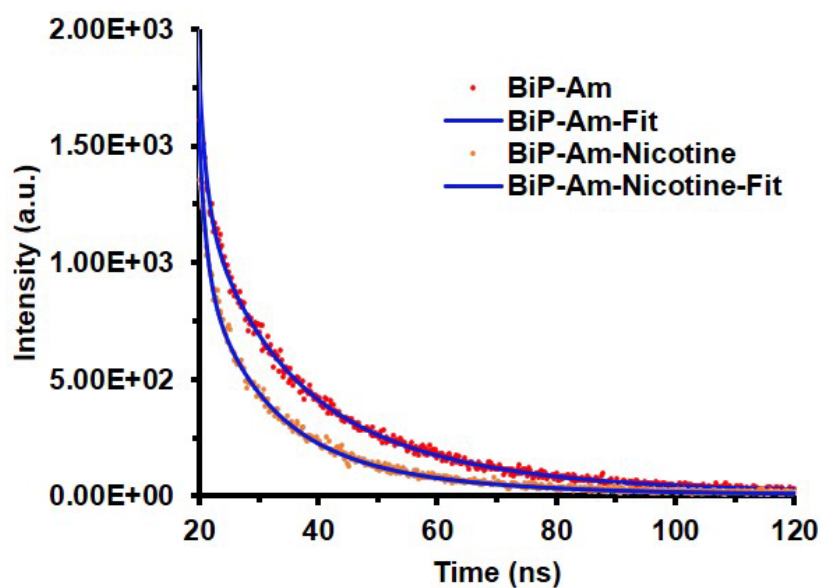

**Figure S11.** Time-resolved photoluminescence decay of the **BiP-Am** before and after the addition of nicotine to the sample in H<sub>2</sub>O:DMSO (9.9:0.1, v:v, 10 μM).

## <sup>1</sup>H NMR nicotine titration

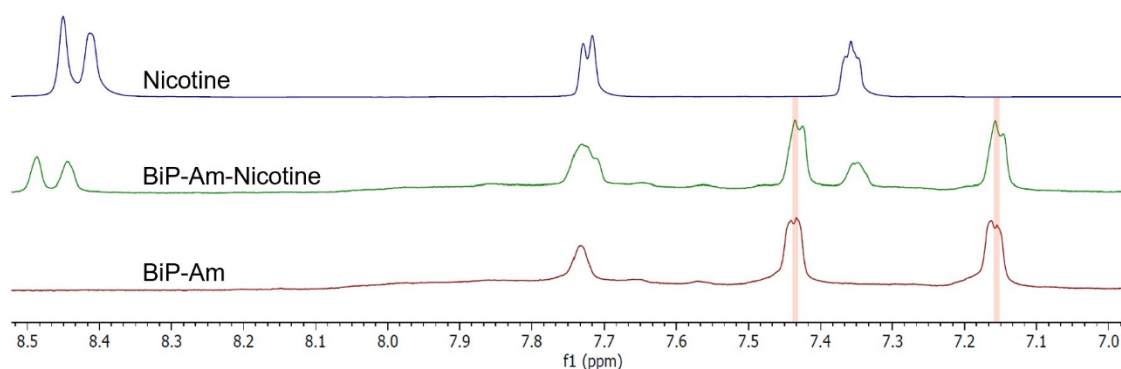

**Figure S12.** <sup>1</sup>H NMR spectra of **BiP-Am**, **BiP-Am-Nicotine** and **Nicotine** in DMSO-*d*<sub>6</sub>:D<sub>2</sub>O (9:1, v:v).

## DLS measurements

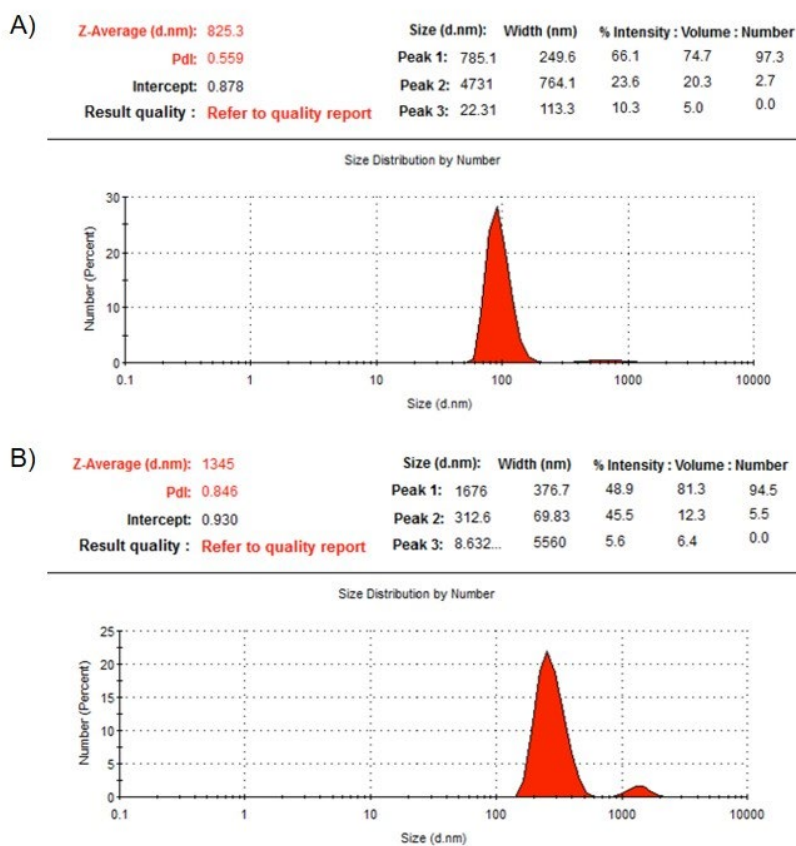

**Figure S13.** DLS data of A) **BiP-Am** and B) after the addition of nicotine to **BiP-Am** probe in H<sub>2</sub>O:DMSO (9.9:0.1, v:v, 10 μM).

## Emission spectra under different excitation wavelengths

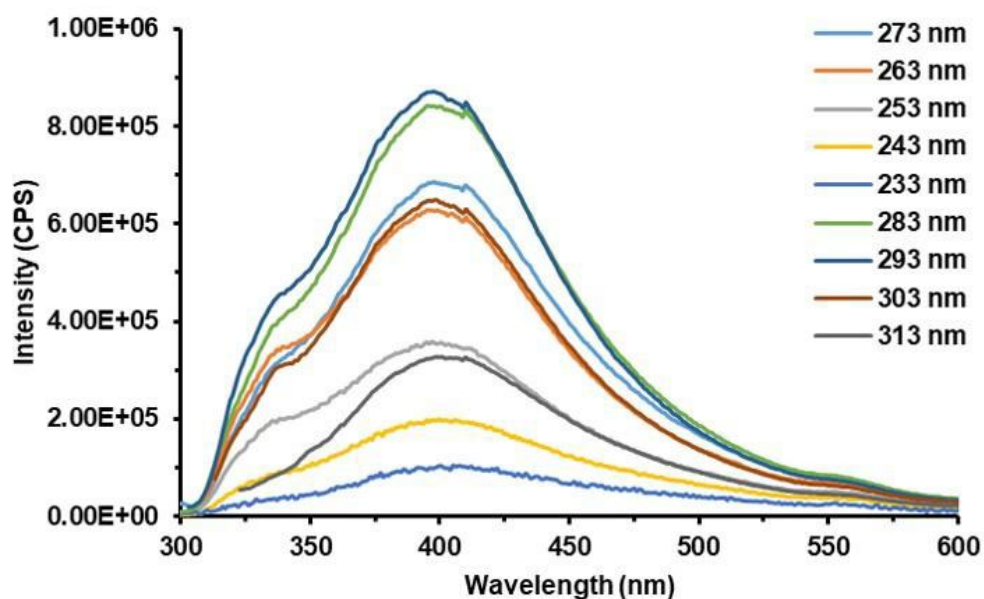

**Figure S14.** The emission spectra of probe **BiP-Am-Nicotine** in H<sub>2</sub>O:DMSO (9.9:0.1, v:v, 10 μM) under various excitation wavelengths (263-313 nm).<sup>12</sup>

## Absorption and emission spectra of Nicotine and BiP-Am

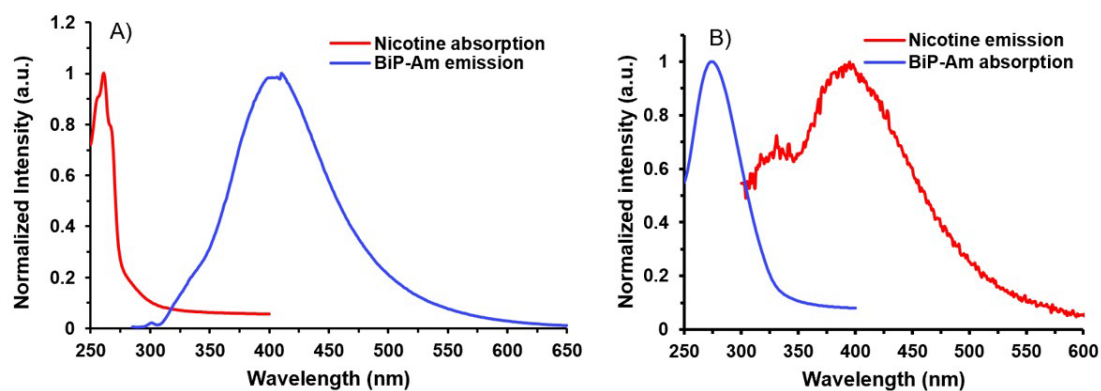

**Figure S15.** Normalized absorption and emission spectra of Nicotine and **BiP-Am** in H<sub>2</sub>O:DMSO (9.9:0.1, v:v, 10 μM) under excitation at 263 nm and 273 nm, respectively.

## BiP-Am emission in different matrices before/after nicotine addition

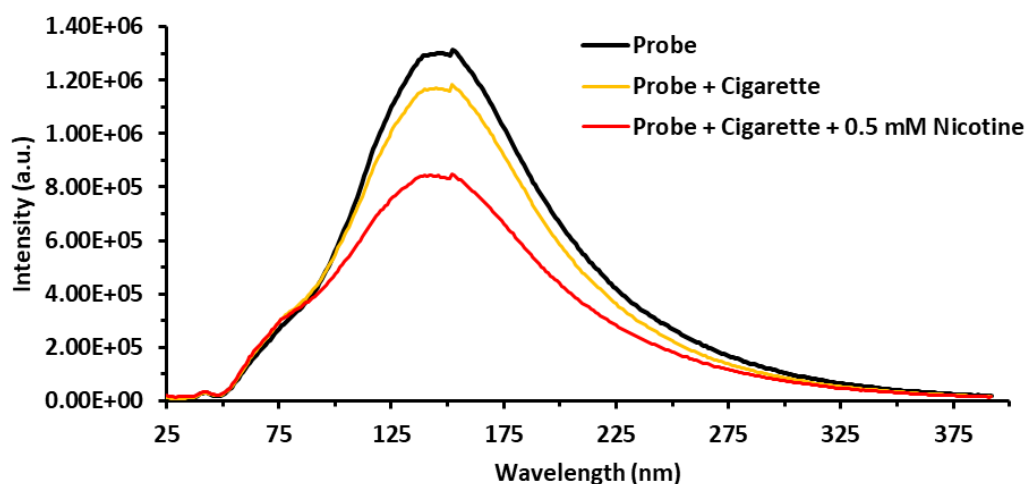

**Figure S16.** The emission spectra of **BiP-Am** in H<sub>2</sub>O:DMSO (9.9:0.1, v:v, 10µM) under excitation at 273 nm (black); after the addition of 50 µL of prepared cigarette solution (orange); and after the addition of 0.5 mM Nicotine (red).

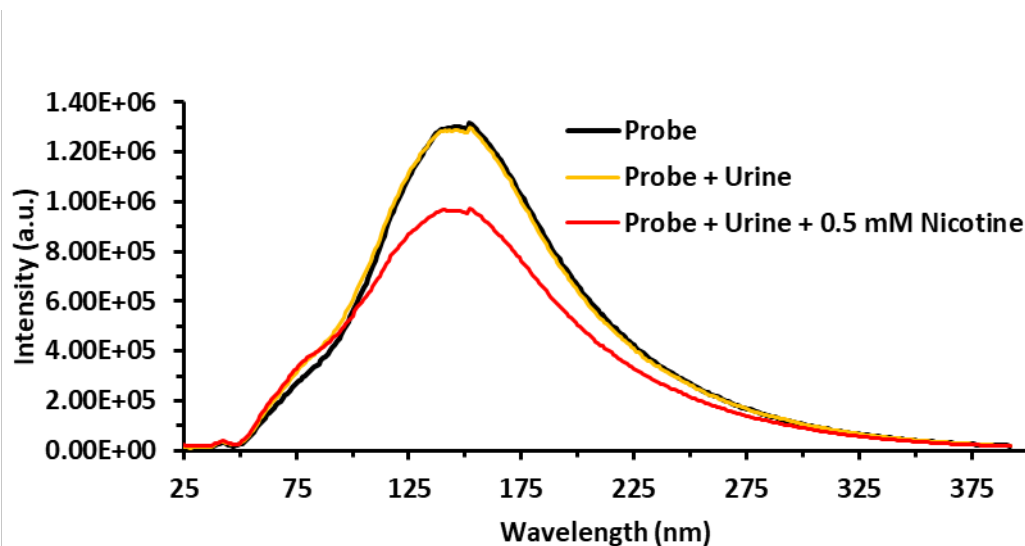

**Figure S17.** The emission spectra of **BiP-Am** in H<sub>2</sub>O:DMSO (9.9:0.1, v:v, 10µM) under excitation at 273 nm (black); after the addition of 50 µL of prepared urine solution (orange); and after the addition of 0.5 mM Nicotine (red).

**Table S2.** DFT and TD-DFT calculated data for ground and excited states.

| Samples  | Basis Set | Solvent | HOMO-Gr<br>(eV) | HOMO-Ex<br>(eV) | LUMO-Gr<br>(eV) | LUMO-Ex<br>(eV) |
|----------|-----------|---------|-----------------|-----------------|-----------------|-----------------|
| Nicotine | 6-31G(d)  | Water   | -5.508          | -4.639          | -0.756          | -1.171          |
| BiP-Am   | 6-31G(d)  | Water   | -5.966          | -5.029          | -1.567          | -2.330          |

| BiP-Am coordinates |          |          |          | Nicotine coordinates |         |         |         |
|--------------------|----------|----------|----------|----------------------|---------|---------|---------|
| N                  | -1.90331 | 3.92392  | -2.25085 | C                    | -1.0397 | -0.2551 | 0.7525  |
| C                  | -3.00278 | 2.99929  | -1.87026 | C                    | -0.3708 | 0.9696  | 0.7066  |
| H                  | -3.72547 | 3.46824  | -1.19181 | C                    | 0.6631  | 1.152   | -0.2112 |
| H                  | -3.56864 | 2.72949  | -2.77183 | N                    | 1.01    | 0.144   | -1.0526 |
| C                  | -2.30269 | 4.78756  | -3.38793 | C                    | 0.3753  | -1.0579 | -1.029  |
| H                  | -2.88833 | 5.64824  | -3.04146 | C                    | -0.6692 | -1.2977 | -0.1185 |
| H                  | -2.94708 | 4.23042  | -4.08022 | C                    | -1.3643 | -2.6556 | -0.1305 |
| C                  | -1.45903 | 4.76964  | -1.11693 | C                    | -2.5902 | -2.8171 | 0.7689  |
| H                  | -0.75118 | 5.52085  | -1.48794 | C                    | -2.825  | -4.2998 | 0.6057  |
| H                  | -2.30531 | 5.33612  | -0.70479 | C                    | -1.4116 | -4.82   | 0.8051  |
| C                  | -0.73961 | 4.02823  | 0.02157  | N                    | -0.5043 | -3.8348 | 0.1645  |
| H                  | 0.01329  | 3.36227  | -0.40564 | C                    | 0.6442  | -3.563  | 1.0517  |
| H                  | -1.44694 | 3.44683  | 0.61649  | H                    | -1.8397 | -0.3737 | 1.4692  |
| C                  | -1.08857 | 5.2658   | -4.21742 | H                    | -0.6526 | 1.7715  | 1.3767  |
| H                  | -0.38317 | 5.83033  | -3.60325 | H                    | 1.1888  | 2.0963  | -0.2572 |
| H                  | -1.44591 | 5.9231   | -5.01721 | H                    | 0.684   | -1.8308 | -1.7214 |
| C                  | -2.50123 | 1.65441  | -1.3014  | H                    | -1.7361 | -2.7841 | -1.1747 |
| H                  | -2.31548 | 1.70852  | -0.226   | H                    | -3.4568 | -2.1881 | 0.4723  |
| H                  | -3.25311 | 0.87251  | -1.4581  | H                    | -2.3234 | -2.6099 | 1.8307  |
| N                  | -1.26895 | 1.24489  | -1.94483 | H                    | -3.1467 | -4.4991 | -0.4426 |
| H                  | -0.85463 | 1.91633  | -2.58401 | H                    | -3.5745 | -4.741  | 1.2966  |
| N                  | -0.40111 | 4.15432  | -4.86461 | H                    | -1.2736 | -5.8464 | 0.4053  |
| H                  | -0.94982 | 3.32685  | -5.0684  | H                    | -1.2444 | -4.8554 | 1.9083  |
| N                  | -0.11382 | 4.95846  | 0.95032  | H                    | 1.1612  | -4.5133 | 1.3053  |
| H                  | -0.64025 | 5.77046  | 1.25173  | H                    | 0.3188  | -3.0635 | 1.9908  |
| C                  | -0.68392 | 0.02215  | -1.72657 | H                    | 1.394   | -2.928  | 0.541   |
| C                  | 0.91325  | 4.00046  | -5.21448 |                      |         |         |         |
| C                  | 1.15588  | 4.92996  | 1.46559  |                      |         |         |         |
| O                  | -1.15088 | -0.83679 | -0.98962 |                      |         |         |         |
| O                  | 1.29411  | 2.91578  | -5.65044 |                      |         |         |         |
| O                  | 1.58244  | 5.8883   | 2.10237  |                      |         |         |         |
| C                  | 0.559    | -0.23043 | -2.4984  |                      |         |         |         |
| C                  | 0.76482  | -1.50097 | -3.04097 |                      |         |         |         |
| C                  | 1.4939   | 0.78224  | -2.72475 |                      |         |         |         |
| C                  | 1.86623  | -1.73628 | -3.87131 |                      |         |         |         |
| H                  | 0.0452   | -2.29621 | -2.85786 |                      |         |         |         |
| C                  | 2.5971   | 0.53524  | -3.54599 |                      |         |         |         |
| H                  | 1.37435  | 1.76743  | -2.28331 |                      |         |         |         |
| C                  | 2.78626  | -0.71438 | -4.16149 |                      |         |         |         |

|   |         |          |          |
|---|---------|----------|----------|
| H | 3.30147 | 1.34312  | -3.73016 |
| C | 1.9     | 5.0935   | -5.04855 |
| C | 3.19196 | 4.74017  | -4.6281  |
| C | 1.62165 | 6.41914  | -5.38271 |
| C | 4.20919 | 5.69938  | -4.49287 |
| H | 3.4104  | 3.69167  | -4.435   |
| C | 2.61084 | 7.39102  | -5.2362  |
| H | 0.65463 | 6.70429  | -5.78366 |
| C | 3.88743 | 7.03418  | -4.78953 |
| H | 2.39749 | 8.4277   | -5.48657 |
| H | 4.63997 | 7.81439  | -4.68489 |
| C | 2.02437 | 3.756    | 1.23645  |
| C | 1.59194 | 2.46202  | 1.5374   |
| C | 3.32107 | 3.96886  | 0.76777  |
| C | 2.44917 | 1.37671  | 1.33165  |
| H | 0.60013 | 2.2891   | 1.94681  |
| C | 4.17417 | 2.88011  | 0.57015  |
| H | 3.67018 | 4.97903  | 0.5651   |
| C | 3.75525 | 1.56556  | 0.84743  |
| H | 2.09604 | 0.377    | 1.58183  |
| H | 5.18026 | 3.06837  | 0.20159  |
| C | 3.88506 | -0.92143 | -5.12279 |
| C | 4.10011 | 0.00091  | -6.16685 |
| C | 4.72637 | -2.04604 | -5.04908 |
| C | 5.12702 | -0.1823  | -7.09614 |
| H | 3.44543 | 0.86645  | -6.27501 |
| C | 5.75221 | -2.24104 | -5.98009 |
| H | 4.58851 | -2.78184 | -4.25921 |
| C | 5.95574 | -1.29781 | -6.98783 |
| H | 5.27102 | 0.53664  | -7.89812 |
| H | 6.38515 | -3.1215  | -5.91511 |
| C | 5.57249 | 5.30526  | -4.08736 |
| C | 5.78882 | 4.44346  | -2.99596 |
| C | 6.69872 | 5.76737  | -4.79288 |
| C | 7.07969 | 4.04408  | -2.63126 |
| H | 4.9454  | 4.08265  | -2.41015 |
| C | 7.99162 | 5.3751   | -4.43231 |
| H | 6.5775  | 6.43118  | -5.6472  |
| C | 8.17821 | 4.49464  | -3.36615 |
| H | 7.21916 | 3.39571  | -1.77108 |
| H | 8.84829 | 5.7502   | -4.98793 |
| C | 4.67139 | 0.42574  | 0.66478  |
| C | 4.26788 | -0.73388 | -0.02392 |
| C | 5.97855 | 0.46749  | 1.18611  |
| C | 5.14293 | -1.80985 | -0.20172 |
| H | 3.26416 | -0.80522 | -0.44031 |
| C | 6.86109 | -0.59911 | 1.00767  |



|   |          |          |          |
|---|----------|----------|----------|
| H | 6.31421  | 1.33382  | 1.75377  |
| C | 6.44067  | -1.72632 | 0.30026  |
| H | 4.81632  | -2.69644 | -0.73901 |
| H | 7.86501  | -0.55089 | 1.42067  |
| C | 7.38675  | -2.83119 | 0.0614   |
| C | 9.55827  | 4.10078  | -3.0101  |
| C | 7.05259  | -1.47508 | -7.95679 |
| O | 7.22096  | -3.91456 | 0.60789  |
| O | 6.85502  | -2.08223 | -9.00211 |
| O | 10.4087  | 4.96525  | -2.82379 |
| N | 8.44739  | -2.6118  | -0.78245 |
| H | 9.09546  | -3.38966 | -0.82805 |
| N | 8.28302  | -0.93928 | -7.66315 |
| H | 8.97608  | -1.0858  | -8.38745 |
| N | 9.89182  | 2.77319  | -2.91702 |
| H | 10.84364 | 2.6294   | -2.59938 |
| C | 8.67952  | -1.44269 | -1.61803 |
| H | 7.75439  | -0.86534 | -1.70177 |
| H | 9.4265   | -0.82505 | -1.10904 |
| C | 9.15497  | -1.83013 | -3.02903 |
| H | 10.1805  | -2.2195  | -2.98821 |
| H | 8.52011  | -2.66311 | -3.36015 |
| C | 8.67312  | -0.25385 | -6.44094 |
| H | 7.81298  | 0.30377  | -6.05761 |
| H | 9.44416  | 0.47578  | -6.70975 |
| C | 9.20836  | -1.23537 | -5.37821 |
| H | 8.65505  | -2.17627 | -5.48252 |
| H | 10.25756 | -1.4823  | -5.58692 |
| C | 9.07099  | 1.61501  | -3.23259 |
| H | 8.51687  | 1.36467  | -2.32265 |
| H | 8.34983  | 1.88612  | -4.01074 |
| C | 9.91333  | 0.41535  | -3.70287 |
| H | 10.49326 | 0.72622  | -4.5815  |
| H | 10.66697 | 0.16503  | -2.94506 |
| N | 9.04205  | -0.73089 | -4.00455 |
| H | 1.97255  | -2.71722 | -4.3309  |

## 6. References

1. I. Mehraj, A. Hamid, U. Gani, N. Iralu, T. Manzoor and S. Saleem Bhat, *ACS Appl. Bio Mater.*, 2024, **7**, 2023-2035.
2. J. Li, P. Liang, H. Song, X. Yu, S. Hu, J. Wang, C. Cheng, Y. Zhao and Z. Su, *Anal. Methods*, 2023, **15**, 6377-6384.
3. C. Yang and B. Yan, *Inorg. Chem.*, 2023, **62**, 20458-20466.
4. Z. Hu and B. Yan, *J. Mater. Chem. A*, 2023, **11**, 4739-4750.
5. T. Leelasree, S. Goel and H. Aggarwal, *ACS Appl. Nano Mater.*, 2022, **5**, 16753-16759.
6. Y. Sha, J. Yu, J. Xiong, C. Yu, X. Zhu, B. Zhang, T. Fei and D. Wu, *Anal. Methods*, 2022, **14**, 1579-1584.
7. Y. Zuo, J. Xu, X. Zhu, X. Duan, L. Lu, Y. Gao, H. Xing, T. Yang, G. Ye and Y. Yu, *Synth. Met.*, 2016, **220**, 14-19.
8. Z. Huang, Z. Li, L. Xu, C. Wei, C. Zhu, H. Deng, H. Peng, X. Xia and W. Chen, *Anal. Chem.*, 2020, **92**, 11438-11443.
9. Y.-J. Huang, Q.-X. Deng, H.-Q. Lan, Z.-Z. Fang, H. Chen, Y. Lin, H.-C. Xu, T. D. James and W. Xie, *Anal. Methods*, 2020, **12**, 193-199.
10. K. Liu, J. Zhang, L. Xu, J. Liu, L. Ding, T. Liu and Y. Fang, *Chem. Commun.*, 2019, **55**, 12679-12682.
11. M. Boiocchi, M. Bonizzoni, L. Fabbrizzi, G. Piovani and A. Taglietti, *Angew. Chem. Int. Ed.*, 2004, **43**, 3847-3852.
12. P. Sharma, M. Kumar and V. Bhalla, *ACS Omega*, 2020, **5**, 19654-19660.
